# Supplementary material for: Propylene oxide as a dehydrating agent: potassium carbonate-catalyzed carboxylative cyclization of propylene glycol with CO2 in a polyethylene glycol/CO2 biphasic system
Source: Royal Society of Chemistry journal article supplement (doi:10.1039/c6ra04422k), 2016-01-01

SUPPORTING INFORMATION

Propylene oxide as dehydrating agent:  
Potassium carbonate-catalyzed carboxylative  
cyclization of propylene glycol with CO<sub>2</sub> in  
polyethylene glycol/CO<sub>2</sub> biphasic system

Zhen-Feng Diao<sup>1</sup>, Chun-Xiang Guo<sup>1</sup>, Zhi-Hua Zhou<sup>1</sup>, Bing Yu<sup>1</sup>, Liang-Nian He<sup>1,2\*</sup>

<sup>1</sup> State Key Laboratory and Institute of Elemento-Organic Chemistry, <sup>2</sup> Collaborative  
Innovation Center of Chemical Science and Engineering, Nankai University, Tianjin  
300071, P. R. China

**General Information.**

Alcohols, epoxides and PEGs used in experiments were purchased from Aladdin. PG was dried with Na<sub>2</sub>SO<sub>4</sub>, then decanted and distilled it under reduced pressure. Additionally, PEGs were dried in vacuum oven at 80 °C for two days and all the catalysts were dried in vacuum conditions at 150 °C for 4 h. CO<sub>2</sub> was commercially available with a purity of 99.99%. Other reagents including diethyl ether, ethyl acetate, petroleum ether, were purchased from Tianjin Guangfu Fine Chemical Research Institute without further purification. GC analyses were performed on Shimadzu GC-2014 equipped with a capillary column (RTX-17 30 m × 0.25 μm) and a flame ionization detector. GC-MS analyses were performed on Shimadzu 2014-QP2010 SE.

NMR spectra were recorded on Bruker 400 in CDCl<sub>3</sub>. <sup>1</sup>H and <sup>13</sup>C NMR chemical shifts (δ) were given in ppm relative to CDCl<sub>3</sub> (7.26 ppm and 77.0 ppm).

#### **General Procedure for K<sub>2</sub>CO<sub>3</sub>-Promoted PC Synthesis from PG and CO<sub>2</sub>.**

A mixture of PG (2.5 mmol), catalyst (5 mol%), epoxide (5 mmol) and PEG<sub>800</sub> (0.5 mmol, 0.4 g) were placed in a 25 mL autoclave, equipped with an inner glass tube. 2 MPa of CO<sub>2</sub> was sequentially introduced into the autoclave and heated to the designed reaction temperature. The final pressure at the reaction temperature was regulated by introducing necessary amount of CO<sub>2</sub> and the mixture was stirred continuously for the designed reaction time. Then the reactor was cooled in ice water after the reaction and the CO<sub>2</sub> was released slowly. After depressurization, the products were extracted with diethyl ether, and analyzed by gas chromatograph using biphenyl as internal standard. The products were further identified using GC-MS by comparing retention times and fragmentation patterns with authentic samples and were also isolated by column chromatography on silica gel (200-300 mesh, ethyl acetate and petroleum ether as eluent, V/V = 1/3) and identified by NMR and MS.

#### **4-methyl-1,3-dioxolan-2-one**

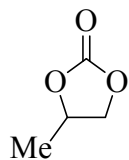

Colorless oil; <sup>1</sup>H NMR (400 MHz, CDCl<sub>3</sub>): δ = 4.93 – 4.77 (m, 1H, CH), 4.55 (t, J = 8.0 Hz, 1H, CH<sub>2</sub>), 4.02 (t, J = 7.8 Hz, 1H, CH<sub>2</sub>), 1.48 (d, J = 6.2 Hz, 3H, CH<sub>3</sub>); <sup>13</sup>C NMR (101 MHz, CDCl<sub>3</sub>): δ = 155.0 (C), 73.5 (CH), 70.7 (CH<sub>2</sub>), 19.5 (CH<sub>3</sub>). EI-MS, m/z (relative int.): 103.14 (26), [M]<sup>+</sup>, 57.03 (100).

dzf-PC  
test

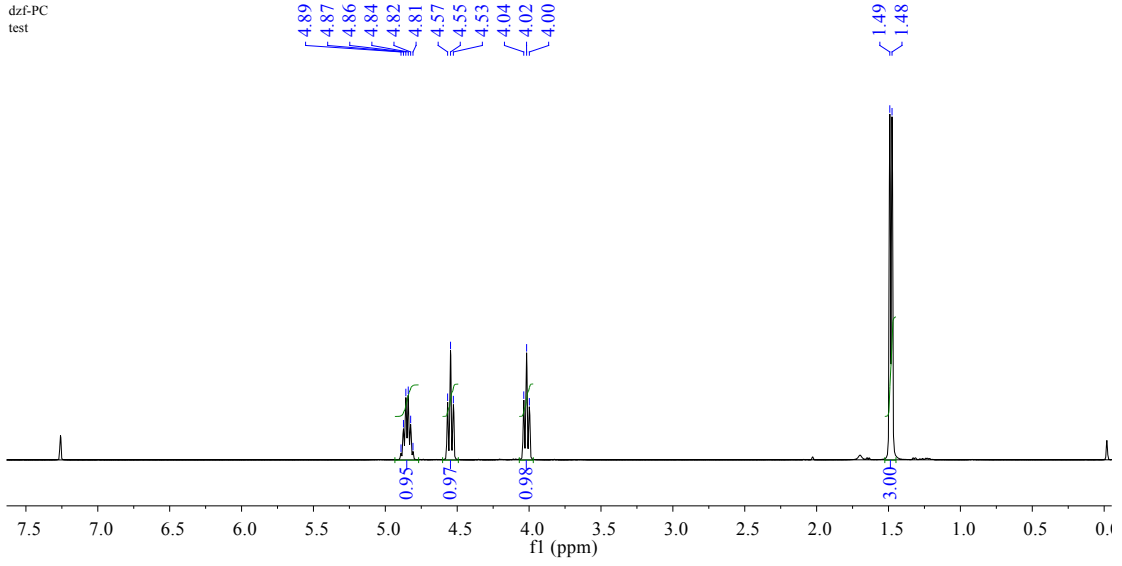

dzf-PC  
test

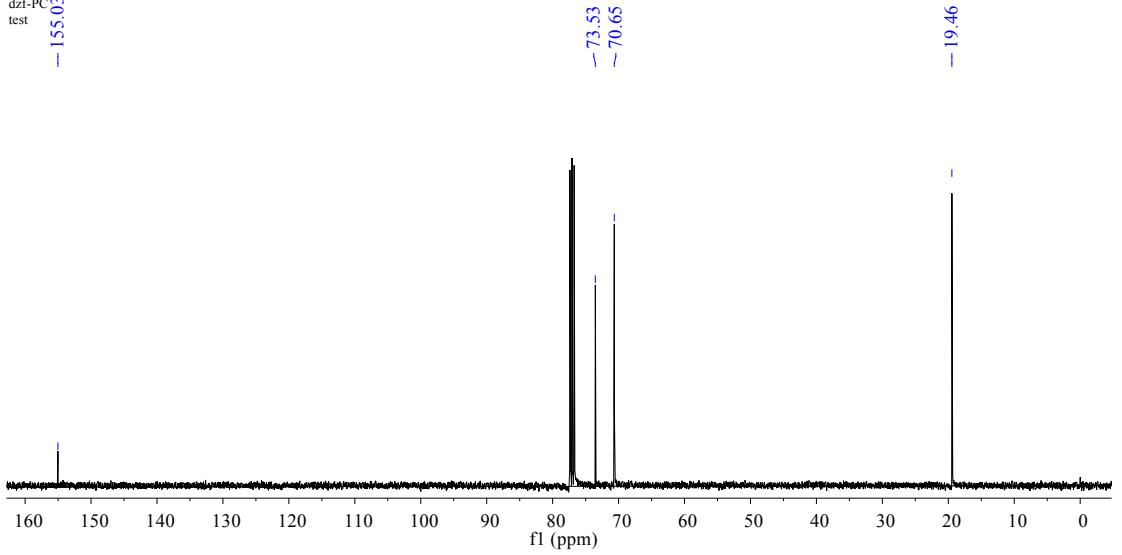

DEF-PC\_140303161913 #1 RT: 4.00 AV: 1 NL: 2.61E4

T: + c Full ms [ 50.00-300.00]

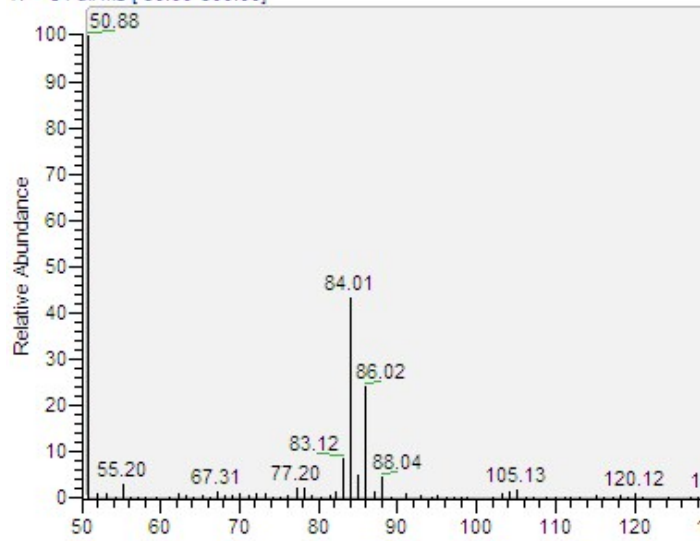

**1,3-dioxolan-2-one (EC):**

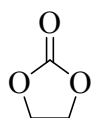

Colorless crystal;  $^1\text{H}$  NMR (400 MHz,  $\text{CDCl}_3$ ):  $\delta = 4.50(\text{s}, 4\text{H}, \text{CH}_2)$ ;  $^{13}\text{C}$  NMR (101 MHz,  $\text{CDCl}_3$ ):  $\delta = 155.5 (\text{C}), 64.6 (\text{CH}_2)$ .

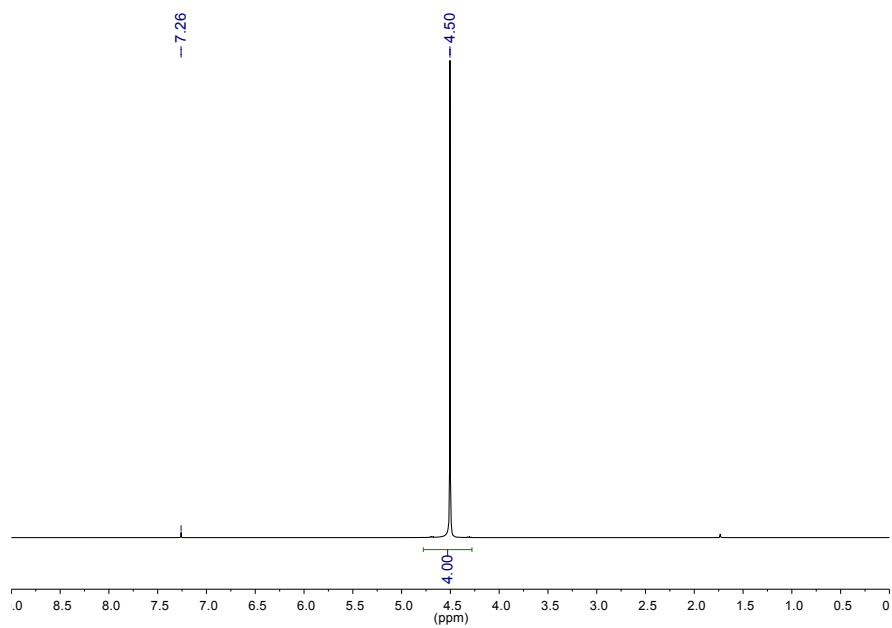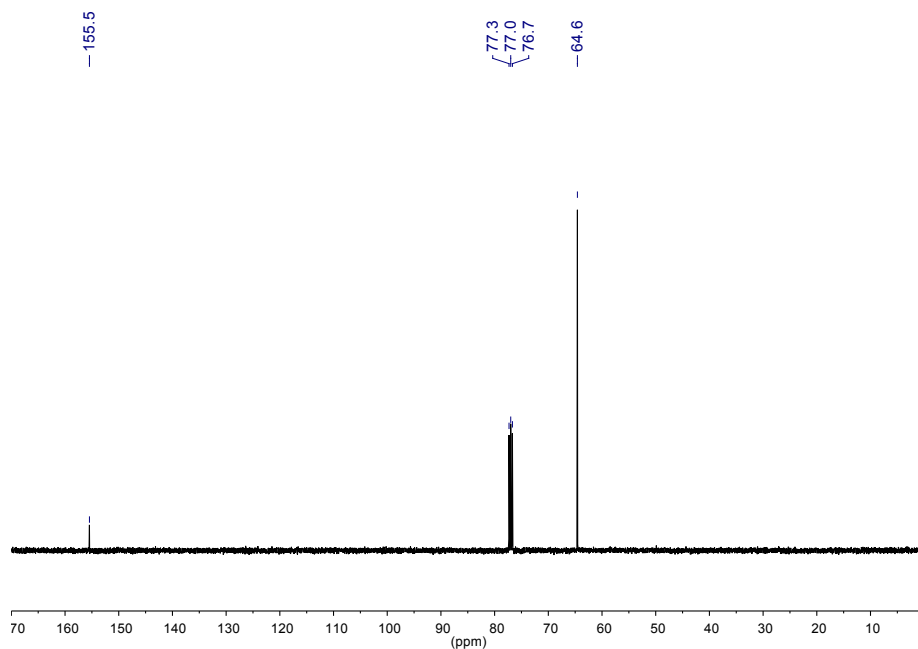

Supplement: c6ra04422k1.pdf [file c6ra04422k1.pdf]
